# Supplementary material
Source: HighWire-hosted journal article supplement (https://cmajopen-stage.highwire.org/highwire/filestream/84942/field_highwire_adjunct_files/0/2019-0213-original-submission.pdf)
Supplement: 2019-0213-original-submission.pdf [file 2019-0213-original-submission.pdf]

## The Association of Diabetes with Frequency and Cost of Hospital Admissions

|                               |                                                                                                                                                                                                                                                                                                                                                                                                                                                                                                                                                                                                                                                                                                                                                                                                                                                                                                                                                                                                                                                                                                                                                                                                                                                                             |
|-------------------------------|-----------------------------------------------------------------------------------------------------------------------------------------------------------------------------------------------------------------------------------------------------------------------------------------------------------------------------------------------------------------------------------------------------------------------------------------------------------------------------------------------------------------------------------------------------------------------------------------------------------------------------------------------------------------------------------------------------------------------------------------------------------------------------------------------------------------------------------------------------------------------------------------------------------------------------------------------------------------------------------------------------------------------------------------------------------------------------------------------------------------------------------------------------------------------------------------------------------------------------------------------------------------------------|
| Journal:                      | CMAJ                                                                                                                                                                                                                                                                                                                                                                                                                                                                                                                                                                                                                                                                                                                                                                                                                                                                                                                                                                                                                                                                                                                                                                                                                                                                        |
| Manuscript ID                 | CMAJ-19-1531                                                                                                                                                                                                                                                                                                                                                                                                                                                                                                                                                                                                                                                                                                                                                                                                                                                                                                                                                                                                                                                                                                                                                                                                                                                                |
| Manuscript Type:              | Research - Cohort study (retrospective)                                                                                                                                                                                                                                                                                                                                                                                                                                                                                                                                                                                                                                                                                                                                                                                                                                                                                                                                                                                                                                                                                                                                                                                                                                     |
| Date Submitted by the Author: | 13-Nov-2019                                                                                                                                                                                                                                                                                                                                                                                                                                                                                                                                                                                                                                                                                                                                                                                                                                                                                                                                                                                                                                                                                                                                                                                                                                                                 |
| Complete List of Authors:     | Choi, Hyoungjin; University of Toronto, Medicine<br>Booth, Gillian; St. Michael's Hospital, Centre for Urban Health Solutions<br>Verma, Amol; St. Michael's Hospital, Li Ka Shing Centre for Healthcare Analytics Research and Training; University of Toronto, Medicine<br>Jung, Hae Young; Li Ka Shing Knowledge Institute<br>Lapointe-Shaw, Lauren; University Health Network, Division of General Internal Medicine<br>Tang, Terence; Trillium Health Partners, Program of Medicine and Institute for Better Health<br>Kwan, Janice; Mount Sinai Hospital, Department of Medicine<br>Rawal, Shail; University Health Network, Division of General Internal Medicine<br>Weinerman, Adina; Sunnybrook Health Sciences Centre, Division of General Internal Medicine<br>Razak, Fahad; Li Ka Shing Knowledge Institute; St Michael's Hospital, Division of General Internal Medicine                                                                                                                                                                                                                                                                                                                                                                                        |
| More Detailed Keywords:       | diabetes, epidemiology, hospitalization, cost, prevalence                                                                                                                                                                                                                                                                                                                                                                                                                                                                                                                                                                                                                                                                                                                                                                                                                                                                                                                                                                                                                                                                                                                                                                                                                   |
| Keywords:                     | Diabetes, Epidemiology                                                                                                                                                                                                                                                                                                                                                                                                                                                                                                                                                                                                                                                                                                                                                                                                                                                                                                                                                                                                                                                                                                                                                                                                                                                      |
| Abstract:                     | <p>Background: Acute inpatient hospitalizations account for greater than half of all healthcare costs related to diabetes. We identified the frequency and costs of the most common conditions leading to hospitalization among patients with diabetes, compared to patients without diabetes.</p> <p>Methods: We used data from a retrospective cohort study of all General Internal Medicine patients in seven Toronto hospitals between 2010 and 2015. The Canadian Institute for Health Information (CIHI) Most Responsible Diagnosis code was used to identify the ten most frequent reasons for admission in patients with diabetes. Cost of hospitalization was estimated using the CIHI Resource Intensity Weight. Comparisons were made between patients with or without diabetes using Pearson's <math>\chi^2</math> test for frequency and distribution-free confidence intervals for median cost.</p> <p>Results: Among the 148,388 hospitalizations in our study, 28% involved patients with diabetes. Compared to patients without diabetes, hospitalizations due to soft tissue and bone infections were most frequent (2.5% vs. 2.0%; prevalence ratio [PR] 1.27, 95% confidence interval [CI] 1.18-1.37) and costly (CAD \$8,795 vs. CAD \$5,845; cost</p> |

1  
2  
3  
4  
5  
6  
7  
8  
9  
10  
11  
12  
13  
14  
15  
16  
17  
18  
19  
20  
21  
22  
23  
24  
25  
26  
27  
28  
29  
30  
31  
32  
33  
34  
35  
36  
37  
38  
39  
40  
41  
42  
43  
44  
45  
46  
47  
48  
49  
50  
51  
52  
53  
54  
55  
56  
57  
58  
59  
60

|  |                                                                                                                                                                                                                                                                                                                                                                                                                                                                                                                                                                    |
|--|--------------------------------------------------------------------------------------------------------------------------------------------------------------------------------------------------------------------------------------------------------------------------------------------------------------------------------------------------------------------------------------------------------------------------------------------------------------------------------------------------------------------------------------------------------------------|
|  | <p>ratio [CR] 1.50, 95%CI 1.37-1.65) among patients with diabetes. This was followed by urinary tract infections (PR 1.15, 95%CI 1.10-1.21, CR 1.23, 95%CI 1.17-1.29), stroke (PR 1.13, 95%CI 1.07-1.19, CR 1.19, 95%CI 1.14-1.25), and electrolyte disorders (PR 1.11, 95%CI 1.03-1.19, CR 1.20, 95%CI 1.08-1.34). Interpretation: Soft tissue and bone infections, urinary tract infections, stroke, and electrolyte disorders are associated with a greater frequency and cost of hospitalization in patients with diabetes than in those without diabetes.</p> |
|  |                                                                                                                                                                                                                                                                                                                                                                                                                                                                                                                                                                    |

SCHOLARONE™  
Manuscripts

# THE ASSOCIATION OF DIABETES WITH FREQUENCY AND COST OF HOSPITAL ADMISSIONS

Jin Choi<sup>1</sup> MD MSc, Gillian Booth<sup>2,3</sup> MD MSc, Amol Verma<sup>2,4</sup> MD MPhil, Hae Young Jung<sup>2</sup> MSc, Lauren Lapointe-Shaw<sup>5</sup> MD PhD, Terence Tang<sup>6</sup> MD, Janice L. Kwan<sup>7</sup> MD MPH, Shail Rawal<sup>5</sup> MD MPH, Adina Weinerman<sup>8</sup> MD MHSc, and Fahad Razak<sup>2,4</sup> MD MSc

Department of Medicine, University of Toronto<sup>1</sup>;  
Li Ka Shing Knowledge Institute, St. Michael's Hospital<sup>2</sup>;  
Division of Endocrinology, St. Michael's Hospital<sup>3</sup>;  
Division of General Internal Medicine, St. Michael's Hospital<sup>4</sup>;  
Division of General Internal Medicine, University Health Network<sup>5</sup>;  
Program of Medicine and Institute for Better Health, Trillium Health Partners<sup>6</sup>;  
Division of General Internal Medicine, Mount Sinai Hospital<sup>7</sup>;  
Division of General Internal Medicine, Sunnybrook Health Sciences Centre<sup>8</sup>;  
Toronto, Ontario, Canada

## Correspondence to:

Fahad Razak, Fahad.Razak@unityhealth.to, 416-864-6060 ext. 77430

## Funding statement:

The General Internal Medicine Inpatient Initiative (GEMINI) study was supported by grants from Green Shield Canada Foundation and the Division of General Internal Medicine, University of Toronto. F.R. is supported by an award from the Mak Pak Chiu and Mak-Soo Lai Hing Chair in General Internal Medicine, University of Toronto.

## Conflicts of interest:

A.V. and F.R. report that they are part-time employees of Health Quality Ontario, the Provincial Clinical Lead for Quality Improvement in General Internal Medicine. No other competing interests were declared.

1  
2  
3  
4  
5  
6  
7  
8  
9  
10  
11  
12  
13  
14  
15  
16  
17  
18  
19  
20  
21  
22  
23  
24  
25  
26  
27  
28  
29  
30  
31  
32  
33  
34  
35  
36  
37  
38  
39  
40  
41  
42  
43  
44  
45  
46  
47  
48  
49  
50  
51  
52  
53  
54  
55  
56  
57  
58  
59  
60

**ABSTRACT**

**Background:** Acute inpatient hospitalizations account for greater than half of all healthcare costs related to diabetes. We identified the frequency and costs of the most common conditions leading to hospitalization among patients with diabetes, compared to patients without diabetes.

**Methods:** We used data from a retrospective cohort study of all General Internal Medicine patients in seven Toronto hospitals between 2010 and 2015. The Canadian Institute for Health Information (CIHI) *Most Responsible Diagnosis* code was used to identify the ten most frequent reasons for admission in patients with diabetes. Cost of hospitalization was estimated using the CIHI *Resource Intensity Weight*. Comparisons were made between patients with or without diabetes using Pearson’s  $\chi^2$  test for frequency and distribution-free confidence intervals for median cost.

**Results:** Among the 148,388 hospitalizations in our study, 28% involved patients with diabetes. Compared to patients without diabetes, hospitalizations due to soft tissue and bone infections were most frequent (2.5% vs. 2.0%; prevalence ratio [PR] 1.27, 95% confidence interval [CI] 1.18-1.37) and costly (CAD \$8,795 vs. CAD \$5,845; cost ratio [CR] 1.50, 95%CI 1.37-1.65) among patients with diabetes. This was followed by urinary tract infections (PR 1.15, 95%CI 1.10-1.21, CR 1.23, 95%CI 1.17-1.29), stroke (PR 1.13, 95%CI 1.07-1.19, CR 1.19, 95%CI 1.14-1.25), and electrolyte disorders (PR 1.11, 95%CI 1.03-1.19, CR 1.20, 95%CI 1.08-1.34).

**Interpretation:** Soft tissue and bone infections, urinary tract infections, stroke, and electrolyte disorders are associated with a greater frequency and cost of hospitalization in patients with diabetes than in those without diabetes.

## INTRODUCTION

Diabetes inflicts a heavy burden on health care systems globally.<sup>1</sup> In Canada and the US, nearly one in ten people are diagnosed with diabetes,<sup>2,3</sup> and this figure has been projected to increase to one in five people by 2050.<sup>4</sup> In 2008, diabetes cost Canada \$2.18 billion in the form of hospitalizations, physician care, and medications.<sup>5</sup> By 2022, new cases of diabetes have been estimated to cost an additional \$15.36 billion.<sup>6</sup> In the US, a quarter of all US health care expenditures in 2017 were incurred by people with diabetes.<sup>3</sup>

Acute inpatient hospitalizations are the primary driver of healthcare costs related to diabetes in Canada and the US. In many jurisdictions including Ontario, Canada, greater than 50% of attributable costs in incident diabetes are accounted by acute inpatient hospitalizations.<sup>3,7</sup> Research has shown diabetes to portend a higher likelihood of heart failure,<sup>8</sup> stroke,<sup>9</sup> and renal failure<sup>10</sup> separately. However, there is a paucity of data describing the specific medical conditions that drive the increased frequency and cost of hospitalization among people with diabetes. Such population-level data could specifically guide public policy in strengthening support for greater outpatient services among people with diabetes.

The objectives of this study are to identify the frequency and costs of the most common conditions leading to hospitalization among patients with diabetes, compared to patients without diabetes.

1  
2  
3  
4  
5  
6  
7  
8  
9  
10  
11  
12  
13  
14  
15  
16  
17  
18  
19  
20  
21  
22  
23  
24  
25  
26  
27  
28  
29  
30  
31  
32  
33  
34  
35  
36  
37  
38  
39  
40  
41  
42  
43  
44  
45  
46  
47  
48  
49  
50  
51  
52  
53  
54  
55  
56  
57  
58  
59  
60

**METHODS**

**Study Design and Population**

This is a retrospective cohort study using data collected by the General Internal Medicine Inpatient Initiative (GEMINI) study, which involves 7 large hospital sites affiliated with the University of Toronto. This study included all patients admitted to or discharged from the General Internal Medicine service at each hospital between April 1, 2010 and March 31, 2015. This includes patients cared for by General Internal Medicine who required an Intensive Care Unit (ICU) admission at any point during their hospitalization or who were transferred to surgical services (for example, for an amputation). There were no exclusion criteria.

A full description of the design and methods of GEMINI has been previously presented.<sup>11</sup> General Internal Medicine accounted for a significant proportion of hospitalizations, including 39% of all emergency admissions. The most responsible care providers on the General Internal Medicine wards were predominantly Internists. A separate inpatient cardiology ward was ubiquitous among all hospitals, but access to respirology, nephrology, hematology, gastroenterology, oncology, and stroke wards varied. There were no separate endocrinology inpatient wards at any centres.

**Data collection**

We collected patient-level characteristics for each admission, including demographic characteristics, diagnoses, interventions, discharge destination and resource use as reported by participating hospitals to the Canadian Institute for Health Information (CIHI) Discharge Abstract Database. Patients with diabetes were identified using CIHI Diagnosis Code (Group 10,

Field 02) which conveys International Statistical Classification of Diseases and Related Health Problems, Tenth Revision (ICD-10) codes as recorded in hospital administrative databases.

For each admission, we identified the primary discharge diagnosis using ICD-10 codes. Diseases were then classified into clinically relevant categories using the Clinical Classifications Software (CCS) tool, which aggregates individual diagnoses into 285 mutually exclusive categories.<sup>11</sup>

To estimate the cost of each hospitalization comparably across sites and years, we used the CIHI Resource Intensity Weight for each admission using the 2015 grouping methodology<sup>12</sup> and multiplied this by the annual cost per weighted case for acute inpatient cases that was reported for each hospital using the Ontario Cost Distribution Methodology.<sup>13</sup> This approach estimates the average amount of hospital resources used for each hospital stay, including costs related to administration, staff, supplies, technology, and equipment, but does not include fee-for-service physician billing costs. Data from the CIHI has been previously validated<sup>14,15</sup> and reliably formed the basis for a substantial body of clinical and health services research.<sup>16,17</sup>

In order to compare the absolute burden and cost of care between individuals with and without diabetes, unadjusted rather than adjusted costs were reported. All costs were reported in Canadian Dollars (CAD).

## **Ethics**

Research Ethics Board approval was obtained from all participating hospitals. Waivers of informed consent were obtained because this was a large retrospective study with minimal risk of re-identification for any individual patient.

1  
2  
3  
4  
5  
6  
7  
8  
9  
10  
11  
12  
13  
14  
15  
16  
17  
18  
19  
20  
21  
22  
23  
24  
25  
26  
27  
28  
29  
30  
31  
32  
33  
34  
35  
36  
37  
38  
39  
40  
41  
42  
43  
44  
45  
46  
47  
48  
49  
50  
51  
52  
53  
54  
55  
56  
57  
58  
59  
60

**Statistical analysis**

The study population was described using means and standard deviations (SD) or medians and interquartile ranges (IQR), as appropriate for continuous or interval distributions, and frequencies for categorical variables. Comparisons were made between patients with or without diabetes using Pearson’s  $\chi^2$  test for frequency and distribution-free confidence intervals for median cost. Our cost data did not satisfy the traditional Mann-Whitney assumption that the distributions of comparison groups are identical to test for the equal medians, thus we employed an alternative distribution-free confidence interval method to compare median costs in our study.<sup>18</sup> For the top ten most frequent reasons for admission among patients with diabetes, we compared frequency and cost of admission using prevalence ratios and cost ratios. Prevalence and cost ratios were computed as the ratio of frequency or cost in patients with diabetes to the frequency or cost in patients without diabetes.<sup>19</sup> Given large sample sizes, we determined differences to be meaningful if they were both statistically significant and ratios were greater than a 10% difference. Cohen<sup>20</sup> has classified an effect size for prevalence comparisons as being small if <20%, and we a priori set an even smaller threshold of a 10% difference to err on the side of over-inclusiveness when trying to identify meaningful differences in cost and prevalence between people with or without diabetes. Further, we conducted sensitivity analyses using only the first hospitalization for all included patients. All analyses were conducted using the R statistical package, version 3.3.2 (R Foundation for Statistical Computing, Vienna, Austria).



## RESULTS

### Study population

There were 148,388 admissions to General Internal Medicine across all hospital sites during the study period. There were 96,073 unique patients. Overall, 41,464 (28%) of all hospitalizations occurred in patients with diabetes, and the majority of hospitalizations (94%) were among patients with type 2 diabetes. Among all hospitalized patients, the median age was 73 years, 50.3% were female, and the mean number of comorbidities was 6.

### Frequency of admissions

The most frequent reasons for admission to General Internal Medicine (Table 1, Table 2) among patients with diabetes were heart failure (7.8%), urinary tract infection (5.1%), stroke (4.8%), pneumonia (4.6%), chronic obstructive pulmonary disease (4.5%), delirium (3.2%), acute renal failure (2.9%), sepsis (2.7%), soft tissue and bone infections (2.5%), and electrolyte disorders (2.4%). In the CCS group of electrolyte disorders, the most common were hyponatremia (57%), dehydration (14%), hypernatremia (10%), hyperkalemia (6%), and hypokalemia (4%) (Data not shown).

The prevalence ratios for these conditions (Figure 1) showed that acute renal failure (prevalence ratio [PR] 2.02; 95% confidence interval [CI] 1.87-2.18), heart failure (PR 1.87; 95%CI 1.79-1.96), soft tissue and bone infections (PR 1.27; 95%CI 1.18-1.37), sepsis (PR 1.27; 95%CI 1.18-1.36), urinary tract infections (PR 1.15; 95% CI 1.10-1.21), delirium (PR 1.15; 95% CI 1.08-1.23), stroke (PR 1.13; 95%CI 1.07-1.19), and electrolyte disorders (PR 1.11; 95%CI 1.03-1.19) were more common reasons for hospitalization among patients with diabetes compared to those without.

**Cost of admissions**

The median cost of admission (Table 1) for each of the most common reasons for admission among patients with diabetes were \$6,812 for heart failure, \$5,442 for urinary tract infection, \$8,270 for stroke, \$6,183 for pneumonia, \$6,278 for chronic obstructive pulmonary disease, \$12,952 for delirium, \$6,301 for acute renal failure, \$10,487 for sepsis, \$8,795 for soft tissue and bone infections, and \$4,422 for electrolyte disorders.

The cost ratios for these conditions (Figure 2, Table 2) showed that admission for soft tissue and bone infections (cost ratio [CR] 1.50, 95%CI 1.37-1.65), urinary tract infection (CR 1.23, 95%CI 1.17-1.29), electrolyte disorders (CR 1.20, 95%CI 1.08-1.34), and stroke (CR 1.19, 95%CI 1.14-1.25) were more costly among patients with diabetes compared to those without. The proportional difference in cost of admission for heart failure, pneumonia, and chronic obstructive pulmonary disease were statistically significant but were not greater than our threshold of 10%.

**Sensitivity analyses**

Sensitivity analyses that used only the first hospitalization for each patient (n=96,073) did not significantly change our results.

## INTERPRETATION

In our study of General Internal Medicine patients, nearly a third had diabetes. Soft tissue and bone infections, urinary tract infections, stroke, and electrolyte disorders were more frequent and costly among patients with diabetes compared to patients without. In addition, hospitalizations for acute renal failure, heart failure, sepsis, and delirium occurred at a greater frequency in the diabetes population, but not at an increased cost.

Diabetes is a highly prevalent and potential driver of illness among hospitalized patients. A recent study has found hypertension to be the most common comorbid condition among patients admitted to hospital with diabetes as the primary admitting reason.<sup>21</sup> However as we have demonstrated, diabetes is rarely itself a reason for admission, but more frequently leads to morbidity and subsequent hospitalization through its multiple potential complications including soft tissue and bone infections, urinary tract infections, stroke, and electrolyte disorders. To our knowledge, our study is the first to provide this essential information for clinicians and policy-makers to understand the broader impact of diabetes on hospitalizations.

Our findings on stroke add to existing knowledge: patients with diabetes have approximately twice the risk of stroke compared with those without diabetes.<sup>22</sup> Rates of stroke have fallen substantially over the last few decades in response to the growing evidence in support of cardioprotective therapies and their adoption to clinical practice.<sup>23</sup> Yet, based on our evidence, admissions for stroke remain more common in patients with diabetes.

In comparison to stroke, the prevention of soft tissue and bone infections have received less attention in the research literature, potentially at the expense of increased morbidity and mortality.<sup>24</sup> In Canada and the US, decades of improvements in rates of non-traumatic lower

1  
2  
3  
4  
5  
6  
7  
8  
9  
10  
11  
12  
13  
14  
15  
16  
17  
18  
19  
20  
21  
22  
23  
24  
25  
26  
27  
28  
29  
30  
31  
32  
33  
34  
35  
36  
37  
38  
39  
40  
41  
42  
43  
44  
45  
46  
47  
48  
49  
50  
51  
52  
53  
54  
55  
56  
57  
58  
59  
60

extremity amputations in patients with diabetes have recently reversed, especially among younger adults.<sup>25,26</sup> A 2017 international meta-analysis comparing the prevalence of diabetic foot ulcers across 33 countries has found Canada (14.8%) to have the second highest rate, after Belgium (16.6%).<sup>27</sup> Foot care is one of the most neglected components of standard diabetes care practices, with only 51% of Canadian patients with diabetes having their feet checked as recommended.<sup>28</sup> With the exception of recent coverage in Ontario, Canada, offloading devices are not currently covered for Canadians with diabetes suffering from foot ulcers.<sup>29</sup> In addition, the prevalence of diabetes is higher in lower-income households,<sup>30</sup> providing real-life context to the 57% of Canadians with diabetes who cannot afford their necessary medications, devices, and supplies.<sup>31</sup>

In order to curb such trends in soft tissue and bone infections, proven preventive modalities including regular foot examination, debridement, mechanical offloading devices, and chiropody must not only be available, but approachable and easily accessible for patients with diabetes who often lack economic or social capital. As part of increasing efforts to integrate information technology into medicine,<sup>32</sup> the recruitment of telemedicine<sup>33</sup> and social media<sup>34</sup> in diabetes foot care may help fill in gaps in accessibility and knowledge dissemination. Given the projected increase in the burden of diabetic foot ulcers, including frequent and costly admissions to hospital as shown in our study, increased primary care efforts and public funding should be specifically directed towards proven preventive strategies and modernized approaches.<sup>35</sup>

Most of our identified diabetes-related conditions were vascular in nature, except for urinary tract infections, delirium and electrolyte disorders. The increased burden of hospitalization secondary to urinary tract infections in diabetes is consistent with existing knowledge.<sup>36</sup> Diabetes is associated with a higher risk of asymptomatic bacteriuria, urinary tract

1  
2  
3 infections, and severe complications. Whether patients with diabetes should be treated if they  
4 have asymptomatic bacteriuria is unknown and may be an important focus of future research. In  
5  
6 addition, ongoing review of the safety of sodium-glucose cotransporter-2 (SGLT2) inhibitors,  
7  
8 which are gaining prominence in diabetes care, is needed to understand its impact on urinary  
9  
10 tract infections among patients with diabetes.<sup>37</sup>  
11  
12  
13  
14

15 Although delirium may be caused by any one of the identified conditions, there is limited  
16  
17 literature on how diabetes can predispose an individual to delirium directly. Diabetes has been  
18  
19 associated with both Alzheimer's and vascular dementia,<sup>38</sup> yet studies on its association with  
20  
21 delirium has been yielded mixed results, and primarily conducted in an intensive care setting.<sup>39</sup>  
22  
23 One plausible hypothesis is the generation of microvascular malformations in the central nervous  
24  
25 system from persistent metabolic derangements leading to endothelial damage and deregulated  
26  
27 angiogenesis.<sup>40</sup> Given that the prevalence of delirium among our patients with diabetes was 24%  
28  
29 higher than among those without, further studies are warranted to understand the mechanism  
30  
31 behind this increased prevalence.  
32  
33  
34  
35

36 Electrolyte disorders were one of the most frequent and costly reasons for admission in  
37  
38 patients with diabetes, yet preventive strategies are lacking. The multifactorial nature of its  
39  
40 pathophysiology in diabetes, likely including poor nutrition, impaired gastrointestinal absorption,  
41  
42 acid-base abnormalities, and pharmacological agents make electrolyte abnormalities a  
43  
44 challenging condition to prevent.<sup>41</sup> Further studies that aim to elucidate the individual  
45  
46 pathophysiologic mechanisms of electrolyte disorders in patients with diabetes will be necessary  
47  
48 in developing outpatient strategies for monitoring and prevention.  
49  
50  
51  
52

### 53 Limitations

54  
55  
56  
57  
58  
59  
60

1  
2  
3 There are several limitations to our study. First, our patients with diabetes were restricted to  
4 those who were admitted for some portion of their hospitalization under a General Internal  
5 Medicine service, and not surgical, psychiatric, or subspecialty medical services. Thus, the  
6 frequency of admissions secondary to diabetes-related complications may be underestimated for  
7 conditions (e.g. acute coronary syndrome) where admissions may occur to non-General Internal  
8 Medicine services. In addition, patients with severe complications may be admitted to a non-  
9 medical service, such as those with osteomyelitis under Orthopaedics. However, General Internal  
10 Medicine now represents more than a third of all emergency room admissions to hospital and  
11 therefore our data captures the largest group of patients requiring hospitalization and represents a  
12 crucial health services group on which to focus.<sup>11</sup> Second, our cost estimations do not take  
13 physician billing and outpatient expenses into account. This would lead to underestimations of  
14 cost of admission and this may affect the cost ratio methods we adopted. Third, our use of the  
15 RIW provides an estimation to the cost of hospital admission but not out-of-pocket costs  
16 including mechanical offloading devices. However, RIW has been previously used in similar  
17 studies,<sup>7,42</sup> and provides a reasonable estimation for the direct healthcare costs attributable to  
18 diabetes. Fourth, our patient population encompasses only two cities in Canada. However, our  
19 inclusion of the five largest hospitals in Toronto and the only two hospitals in Mississauga,  
20 Canada's first and ninth most populous municipalities respectively, adds to our generalizability.

21  
22  
23  
24  
25  
26  
27  
28  
29  
30  
31  
32  
33  
34  
35  
36  
37  
38  
39  
40  
41  
42  
43  
44  
45 **Conclusion**

46 There is a substantial burden of diabetes on acute hospitalizations. This is the first study to  
47 characterize the frequency and costs associated with acute inpatient hospitalizations from various  
48 diabetes-related conditions in General Internal Medicine. Based on our findings, a preventive  
49 strategy focused on reducing hospitalizations secondary to soft tissue and bone infections,  
50  
51  
52  
53  
54  
55  
56  
57  
58  
59  
60

1  
2  
3 urinary tract infections, stroke, and electrolyte disorders in patients with diabetes may be  
4  
5 beneficial in this high-risk group.  
6  
7  
8  
9  
10  
11  
12  
13  
14  
15  
16  
17  
18  
19  
20  
21  
22  
23  
24  
25  
26  
27  
28  
29  
30  
31  
32  
33  
34  
35  
36  
37  
38  
39  
40  
41  
42  
43  
44  
45  
46  
47  
48  
49  
50  
51  
52  
53  
54  
55  
56  
57  
58  
59  
60

Confidential

1  
2  
3  
4  
5  
6  
7  
8  
9  
10  
11  
12  
13  
14  
15  
16  
17  
18  
19  
20  
21  
22  
23  
24  
25  
26  
27  
28  
29  
30  
31  
32  
33  
34  
35  
36  
37  
38  
39  
40  
41  
42  
43  
44  
45  
46  
47  
48  
49  
50  
51  
52  
53  
54  
55  
56  
57  
58  
59  
60

**ACKNOWLEDGEMENTS**

J.C. wrote the first draft of the manuscript. H.Y.J. provided statistical analysis. J.C., G.B., A.V., F.R. contributed to the interpretation of data, critically revised the manuscript, and approved the final version for submission. L.L.S., T.T., J.K., S.R., and A.W. critically revised the manuscript. F.R. is the guarantor of this work and as such, had full access to all the data in the study and takes responsibility for the integrity of the data and accuracy of the data analysis.

Confidential



## REFERENCES

1. Guariguata L, Whiting DR, Hambleton I, Beagley J, Linnenkamp U, Shaw JE. Global estimates of diabetes prevalence for 2013 and projections for 2035. *Diabetes research and clinical practice* 2014;**103**(2):137-49
2. Diabetes Canada. Diabetes Statistics in Canada. Secondary Diabetes Statistics in Canada 2017. [http://www.diabetes.ca/how-you-can-help/advocate/why-federal-leadership-is-essential/diabetes-statistics-in-canada#\\_ftn1](http://www.diabetes.ca/how-you-can-help/advocate/why-federal-leadership-is-essential/diabetes-statistics-in-canada#_ftn1).
3. American Diabetes Association. Economic costs of diabetes in the US in 2017. *Diabetes care* 2018;**41**(5):917-28
4. Boyle JP, Thompson TJ, Gregg EW, Barker LE, Williamson DF. Projection of the year 2050 burden of diabetes in the US adult population: dynamic modeling of incidence, mortality, and prediabetes prevalence. *Population health metrics* 2010;**8**(1):29
5. Canada PHAo. Economic burden of illness in Canada, 2005–2008: Public Health Agency of Canada Ottawa, ON, 2014.
6. Anja B, Laura RJHp, chronic disease prevention in Canada: research p, practice. The cost of diabetes in Canada over 10 years: applying attributable health care costs to a diabetes incidence prediction model. 2017;**37**(2):49
7. Rosella L, Lebenbaum M, Fitzpatrick T, et al. Impact of diabetes on healthcare costs in a population-based cohort: a cost analysis. *Diabetic Medicine* 2016;**33**(3):395-403
8. Cavender MA, Steg PG, Smith Jr SC, et al. Impact of diabetes mellitus on hospitalization for heart failure, cardiovascular events, and death: outcomes at 4 years from the Reduction of Atherothrombosis for Continued Health (REACH) registry. *Circulation* 2015;**132**(10):923-31
9. Megherbi S-E, Milan C, Minier D, et al. Association between diabetes and stroke subtype on survival and functional outcome 3 months after stroke: data from the European BIOMED Stroke Project. *Stroke* 2003;**34**(3):688-94
10. Thakar CV, Christianson A, Himmelfarb J, Leonard A. Acute kidney injury episodes and chronic kidney disease risk in diabetes mellitus. *Clinical journal of the American Society of Nephrology* 2011;**6**(11):2567-72
11. Verma AA, Guo Y, Kwan JL, et al. Patient characteristics, resource use and outcomes associated with general internal medicine hospital care: the General Medicine Inpatient Initiative (GEMINI) retrospective cohort study. *CMAJ open* 2017;**5**(4):E842
12. Canadian Institute for Health Information. DAD resource intensity weights and expected length of stay (ELOS) for CMG+ 2015. Ottawa, 2015.
13. Wodchis WP, Bushmeneva K, Nikitovic M, McKillop I. Guidelines on person-level costing using administrative databases in Ontario: Health System Performance Research Network, 2013.
14. Jolley RJ, Quan H, Jetté N, et al. Validation and optimisation of an ICD-10-coded case definition for sepsis using administrative health data. *BMJ open* 2015;**5**(12):e009487
15. Tu K, Mitiku T, Guo H, Lee D, Tu J. Myocardial infarction and the validation of physician billing and hospitalization data using electronic medical records. *Chronic Diseases and Injuries in Canada* 2010;**30**(4)
16. Gomes T, Martins D, Tadrous M, et al. Association of a blood glucose test strip quantity-limit policy with patient outcomes: a population-based study. *JAMA internal medicine* 2017;**177**(1):61-66

17. Fillion KB, Azoulay L, Platt RW, et al. A multicenter observational study of incretin-based drugs and heart failure. *New England Journal of Medicine* 2016;**374**(12):1145-54

18. Price RM, Bonett DG. Distribution-free confidence intervals for difference and ratio of medians. *Journal of Statistical Computation and Simulation* 2002;**72**(2):119-24

19. Rothman KJ. *Epidemiology: an introduction*: Oxford university press, 2012.

20. Cohen J. *Statistical power analysis for the behavioral sciences*: Routledge, 2013.

21. Wielgosz A, Dai S, Walsh P, McCrea-Logie J, Celebican E. Comorbid Conditions in Canadians Hospitalized Because of Diabetes. *Canadian journal of diabetes* 2017

22. Collaboration ERF. Diabetes mellitus, fasting blood glucose concentration, and risk of vascular disease: a collaborative meta-analysis of 102 prospective studies. *The Lancet* 2010;**375**(9733):2215-22

23. Fang MC, Perrailon MC, Ghosh K, Cutler DM, Rosen A. Trends in stroke rates, risk, and outcomes in the United States, 1988 to 2008. *The American journal of medicine* 2014;**127**(7):608-15

24. Gregg EW, Sattar N, Ali MK. The changing face of diabetes complications. *The Lancet Diabetes & Endocrinology* 2016;**4**(6):537-47

25. Geiss LS, Li Y, Hora I, Albright A, Rolka D, Gregg E. Resurgence of diabetes-related nontraumatic lower-extremity amputation in the young and middle-aged adult US population. *Diabetes care* 2019;**42**(1):50-54

26. Hussain MA, Al-Omran M, Salata K, et al. Population-based secular trends in lower-extremity amputation for diabetes and peripheral artery disease. *Canadian Medical Association Journal* 2019;**191**(35):E955-E61

27. Zhang P, Lu J, Jing Y, Tang S, Zhu D, Bi Y. Global epidemiology of diabetic foot ulceration: a systematic review and meta-analysis. *Annals of Medicine* 2017;**49**(2):106-16

28. Canadian Institute for Health Information. Diabetes Care Gaps and Disparities in Canada, 2009.

29. Diabetes Canada. Diabetes Canada welcomes the Government of Ontario announcement to fund devices to help prevent amputations, 2017.

30. Public Health Agency of Canada. Chronic Disease and Injury Indicator Framework, Quick Stats, Fall 2014 Edition. 2014

31. Diabetes Canada. The Burden of Out-of-Pocket Costs for Canadians with Diabetes, 2012.

32. Blumenthal D. Stimulating the adoption of health information technology. *New England journal of medicine* 2009;**360**(15):1477-79

33. Kolltveit B-CH, Gjengedal E, Graue M, Iversen MM, Thorne S, Kirkevold M. Conditions for success in introducing telemedicine in diabetes foot care: a qualitative inquiry. *BMC nursing* 2017;**16**(1):2

34. Abedin T, Al Mamun M, Lasker MA, et al. Social media as a platform for information about diabetes foot care: a study of Facebook groups. *Canadian journal of diabetes* 2017;**41**(1):97-101

35. Diabetes Canada. Impact of offloading devices on the cost of diabetic foot ulcers in Ontario, 2016.

36. Stapleton A. Urinary tract infections in patients with diabetes. *The American journal of medicine* 2002;**113**(1):80-84

37. Liu J, Li L, Li S, et al. Effects of SGLT2 inhibitors on UTIs and genital infections in type 2 diabetes mellitus: a systematic review and meta-analysis. *Scientific reports* 2017;**7**(1):2824

38. Biessels GJ, Staekenborg S, Brunner E, Brayne C, Scheltens P. Risk of dementia in diabetes mellitus: a systematic review. *The Lancet Neurology* 2006;**5**(1):64-74
39. Van Keulen K, Knol W, Belitser SV, et al. Diabetes and glucose dysregulation and transition to delirium in ICU patients. *Critical care medicine* 2018;**46**(9):1444-49
40. Breier G, Chavakis T, Hirsch E. Angiogenesis in metabolic-vascular disease. *Thrombosis and haemostasis* 2017;**117**(07):1289-95
41. Liamis G, Liberopoulos E, Barkas F, Elisaf M. Diabetes mellitus and electrolyte disorders. *World Journal of Clinical Cases* 2014;**2**(10):488
42. Simpson SH, Corabian P, Jacobs P, Johnson JA. The cost of major comorbidity in people with diabetes mellitus. *Canadian Medical Association Journal* 2003;**168**(13):1661-67

Confidential

Figure 1. Prevalence ratios of most responsible reasons for diagnosis

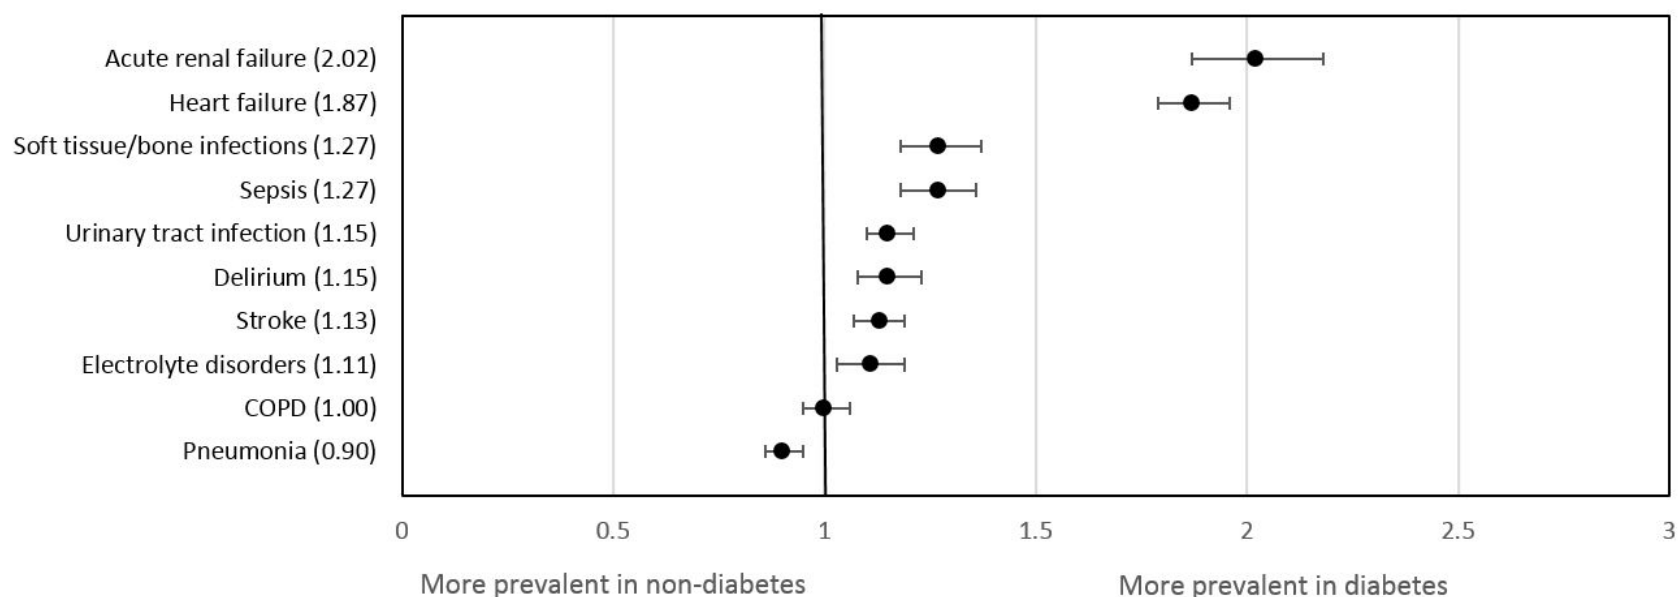

*Most responsible diagnosis (prevalence ratio).*

Figure 2. Cost ratios of most responsible reasons for diagnosis

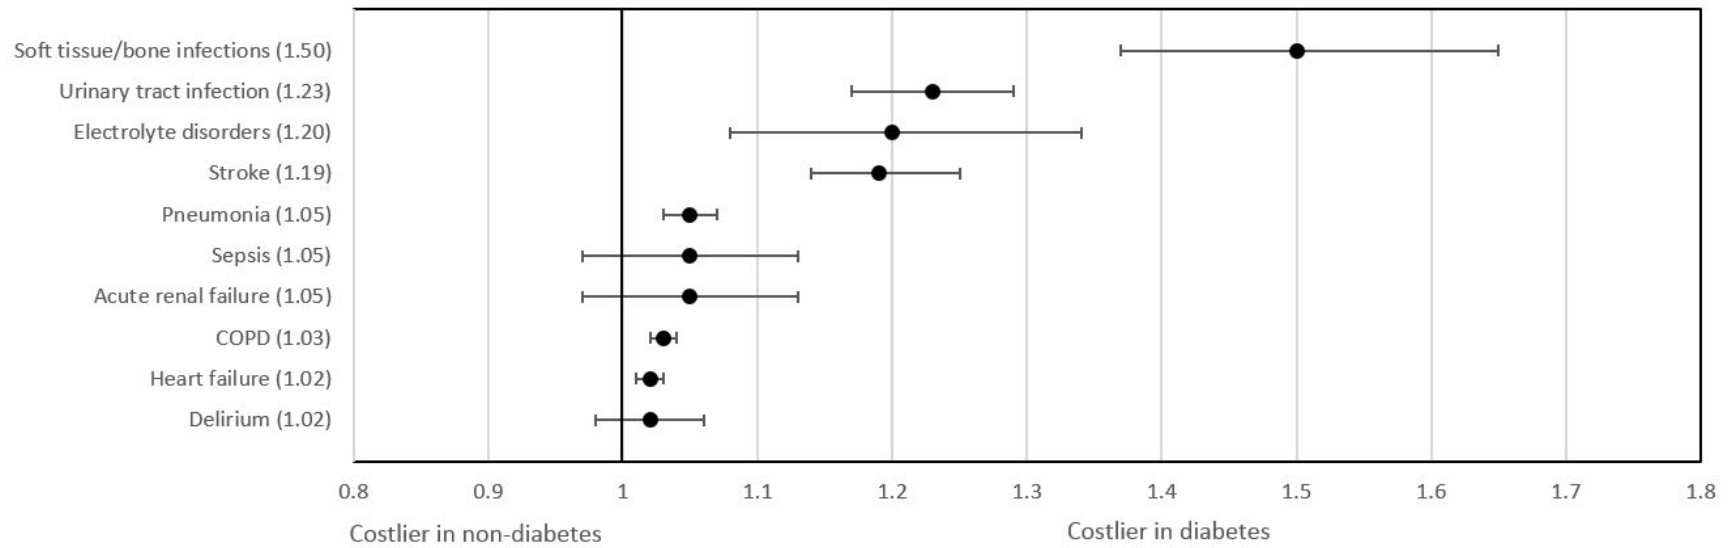

*Most responsible diagnosis (cost ratio).*

1  
2  
3  
4  
5  
6  
7  
8  
9  
10  
11  
12  
13  
14  
15  
16  
17  
18  
19  
20  
21  
22  
23  
24  
25  
26  
27  
28  
29  
30  
31  
32  
33  
34  
35  
36  
37  
38  
39  
40  
41  
42  
43  
44  
45  
46  
47

Table 1. Prevalence and cost of admission for most common reasons for hospitalization, stratified by diabetes status

| Most Common Reason for Hospitalization | Prevalence, N (%) |            |             | Cost of Admission, median (CAD) |          |             |
|----------------------------------------|-------------------|------------|-------------|---------------------------------|----------|-------------|
|                                        | Overall           | Diabetes   | No Diabetes | Overall                         | Diabetes | No Diabetes |
| Heart Failure                          | 7639 (5.1)        | 3215 (7.8) | 4424 (4.1)  | 6717                            | 6812     | 6670        |
| Urinary tract infection                | 6890 (4.6)        | 2129 (5.1) | 4761 (4.5)  | 5071                            | 5442     | 4427        |
| Cerebral infarction                    | 6556 (4.4)        | 1996 (4.8) | 4560 (4.3)  | 7122                            | 8270     | 6922        |
| Pneumonia                              | 7381 (5.0)        | 1914 (4.6) | 5467 (5.1)  | 6010                            | 6183     | 5902        |
| COPD                                   | 6605 (4.5)        | 1848 (4.5) | 4757 (4.4)  | 6148                            | 6278     | 6095        |
| Delirium                               | 4345 (2.9)        | 1342 (3.2) | 3003 (2.8)  | 12831                           | 12952    | 12700       |
| Acute renal failure                    | 2726 (1.8)        | 1197 (2.9) | 1529 (1.4)  | 6176                            | 6301     | 6025        |
| Sepsis                                 | 3434 (2.3)        | 1132 (2.7) | 2302 (2.2)  | 10025                           | 10487    | 9995        |
| Soft tissue and bone infections        | 3127 (2.1)        | 1032 (2.5) | 2095 (2.0)  | 6721                            | 8795     | 5845        |
| Electrolyte disorders                  | 3365 (2.3)        | 1010 (2.4) | 2355 (2.2)  | 3768                            | 4422     | 3679        |

*COPD (Chronic Obstructive Pulmonary Disease). CAD (Canadian Dollars).*

*Table rows ordered by prevalence among people with diabetes.*

Table 2. Most Common Reasons for Hospitalization, stratified by increase in prevalence and cost of hospitalization

|                                     |               | Cost of Admission in Diabetes                                                             |                                                            |
|-------------------------------------|---------------|-------------------------------------------------------------------------------------------|------------------------------------------------------------|
|                                     |               | Increased*                                                                                | Not Increased                                              |
| Prevalence of Admission in Diabetes | Increased*    | Stroke<br>Urinary tract infection<br>Soft tissue/bone infections<br>Electrolyte disorders | Acute renal failure<br>Heart failure<br>Sepsis<br>Delirium |
|                                     | Not Increased |                                                                                           | Pneumonia<br>COPD                                          |

*COPD (Chronic Obstructive Pulmonary Disease).*

*\*Both statistically significant and greater than 10% increase.*
